# Supplementary material for: INCIDENCE OF VENOUS THROMBOTIC EVENTS AND EVENTS OF SPECIAL INTEREST IN A RETROSPECTIVE COHORT OF COMMERCIALLY-INSURED US PATIENTS
Source: bioRxiv or medRxiv preprint supplement (doi:10.1101/2021.06.13.21258854), 2021-11-10

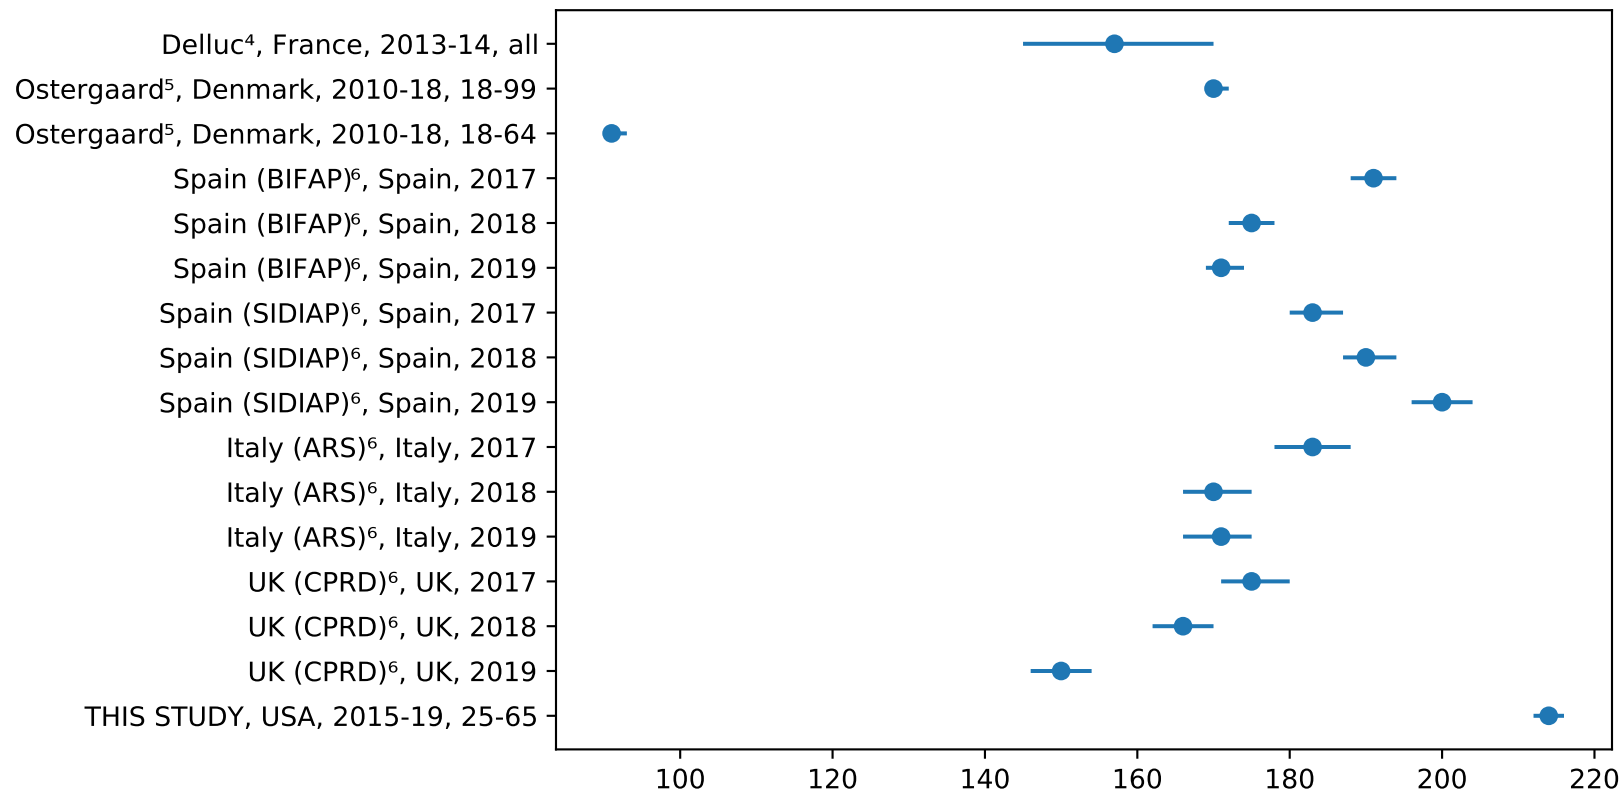

Supplement: Supplementary file [file media-1.pdf]
